# Supplementary material for: Causes and consequences of crossing-over evidenced via a high-resolution recombinational landscape of the honey bee
Source: PubMed Central journal article supplement (PMC4305242; doi:10.1186/s13059-014-0566-0), 2015-01-02
Supplement: 13059_2014_566_MOESM2_ESM.pdf [file 13059_2014_566_MOESM2_ESM.pdf]

**Table S1. Summary statistics for sequencing data.**

| Colony A                    |                 |            | Colony C |                 |            | Colony E |                 |            |
|-----------------------------|-----------------|------------|----------|-----------------|------------|----------|-----------------|------------|
| Sample                      | Genome Coverage | Mean Depth | Sample   | Genome Coverage | Mean Depth | Sample   | Genome Coverage | Mean Depth |
| Queen                       | 98%             | 81.02      | Queen    | 98%             | 59.73      | Queen    | 98%             | 61.52      |
| A8* (1 <sup>st</sup> Seq.)  | 96%             | 26.33      | C5       | 98%             | 34.51      | ED3      | 97%             | 30.18      |
| A8* (2 <sup>nd</sup> Seq.)  | 90%             | 23.89      | C6       | 98%             | 35.84      | ED4      | 97%             | 29.95      |
| A9                          | 98%             | 48.32      | C7       | 98%             | 35.06      | ED5      | 98%             | 30.01      |
| A17                         | 97%             | 25.06      | C8       | 98%             | 35.47      | ED6      | 97%             | 29.89      |
| A19                         | 98%             | 23.58      | C16      | 98%             | 35.76      | ED8      | 97%             | 29.56      |
| A20                         | 95%             | 22.64      | C17      | 98%             | 35.39      | ED13     | 97%             | 29.78      |
| A23                         | 98%             | 50.41      | C23      | 98%             | 35.52      | ED16     | 98%             | 29.79      |
| A38* (1 <sup>st</sup> Seq.) | 93%             | 30.58      | C24      | 98%             | 35.17      | ED17     | 98%             | 30.13      |
| A38* (2 <sup>nd</sup> Seq.) | 84%             | 24.06      | C26      | 98%             | 35.48      | ED18     | 96%             | 30.22      |
| A40                         | 98%             | 45.76      | C27      | 98%             | 35.12      | ED21     | 95%             | 30.57      |
| A41                         | 98%             | 30.08      | C28      | 98%             | 35.15      | ED22     | 98%             | 30.10      |
| A42                         | 98%             | 73.62      | C32      | 98%             | 37.88      | ED28     | 97%             | 30.72      |
| A48                         | 98%             | 48.53      | C35      | 98%             | 36.36      | ED30     | 97%             | 30.00      |
| A54                         | 90%             | 35.35      | C36      | 98%             | 35.54      | EW2      | 97%             | 30.52      |
| A58                         | 95%             | 35.31      | C38      | 98%             | 35.50      | EW8      | 98%             | 30.57      |
| A59                         | 98%             | 80.36      |          |                 |            | EW9      | 98%             | 29.62      |
| A61* (1 <sup>st</sup> Seq.) | 96%             | 35.5       |          |                 |            | EW16     | 98%             | 30.25      |
| A61* (2 <sup>nd</sup> Seq.) | 94%             | 23.84      |          |                 |            | EW24     | 98%             | 30.94      |
|                             |                 |            |          |                 |            | EW29     | 98%             | 30.27      |

\*Three samples, A8, A38 and A61, were sequenced twice.

In the sample column, A8-A61, C5-C38 and ED3-ED30 are stand for drones and EW2-EW29 are stand for workers.

**Table S2. Detected markers in three honeybee colonies.**

|                                                          | Colony A                                                                 | Colony C              | Colony E              |                |
|----------------------------------------------------------|--------------------------------------------------------------------------|-----------------------|-----------------------|----------------|
| HetSNPs detected in queen (Quality score>30)             | 960, 246 (100%)                                                          | 954, 527 (100%)       | 920, 528 (100%)       |                |
| Removed markers                                          | HetSNP is called in 1 or more drones <sup>a</sup>                        | 227, 975(24%)         | 197, 342 (21%)        | 206, 607 (22%) |
|                                                          | No coverage, deletion or low quality <sup>b</sup>                        | 59, 514 (6%)          | 13, 580 (1%)          | 25, 577 (3%)   |
|                                                          | Same genotype in all dornes or drones have different genotype from queen | 823 (0.09%)           | 2, 605 (0.3%)         | 728 (0.08%)    |
|                                                          | SNPs around indel <sup>c</sup>                                           | 244 (0.03%)           | 237 (0.02%)           | 152 (0.02%)    |
| <b>Final markers used to detect recombination events</b> | <b>671, 690 (70%)</b>                                                    | <b>740, 763 (78%)</b> | <b>687, 464 (75%)</b> |                |

<sup>a</sup> For hetSNP sites in each queen, if hetSNP also are called in 1 or more drones at this site, then this marker is removed due to potential multi-copy in this region.

<sup>b</sup> For each hetSNP site, if  $\geq 1$  drone have no coverage, deletion or low quality score (<30) at this site, then this marker is removed.

<sup>c</sup> For these markers around indels, some of them were found to be false due to the misalignment, and false markers will introduce genotype change. Therefore, in small genotype blocks (<10 Kb), all of the markers around indels within 20 bp were removed.

**Table S3. HetSNPs detected in drones.** Only these  $\geq 2$  linked hetSNPs in the drones were used to detect multi-copy regions in the genomes.

|                                                  | Colony A            | Colony C            | Colony E            |
|--------------------------------------------------|---------------------|---------------------|---------------------|
| HetSNP is called in 1 or more drones             | 227, 975 (100%)     | 197, 342 (100%)     | 206, 607 (100%)     |
| HetSNP is called in 2 or more drones             | 177, 671 (78%)      | 175, 731 (89%)      | 180, 460 (87%)      |
| $\geq 2$ linked hetSNPs (Distance < 2 kb)        | 169, 805 (74%)      | 167, 575 (85%)      | 172, 383 (83%)      |
| <b>No. of drone-hetSNPs sites in each colony</b> | <b>169, 805</b>     | <b>167, 575</b>     | <b>172, 383</b>     |
| Shared hetSNPs by 3 colonies                     | 53, 989             | 53, 989             | 53, 989             |
| Shared hetSNPs by 2 colonies only                | 57, 987             | 48, 899             | 52, 258             |
| Specific hetSNPs                                 | 57, 829             | 64, 687             | 66, 136             |
| <b>No. of regions with hetSNPs (Length, Mb)</b>  | <b>16984 (28.8)</b> | <b>16938 (30.7)</b> | <b>17141 (30.2)</b> |
| Shared regions by 3 colonies (Mb)                | 9854 (22.5)         | 9691 (23.4)         | 9772 (23.3)         |
| Shared by 2 colonies only (Mb)                   | 4624 (4.5)          | 4145 (4.8)          | 4253 (4.6)          |
| Colony Specify                                   | 2506 (1.8)          | 3102 (2.5)          | 3115 (2.3)          |

The combined length of 16 chromosomes is 219.63 Mb.

**Table S4. Number of crossovers and gene conversions in each sequenced sample.**  
 These numbers include multiple crossovers between a given pair of markers.

| <b>Sample</b> | <b>Number of<br/>crossovers<br/>(<math>\geq 10</math> kb)</b> | <b>Number of<br/>crossovers<br/>(<math>\geq 100</math> kb)</b> | <b>Number of<br/>crossovers<br/>(<math>\geq 500</math> kb)</b> | <b>Number of<br/>gene<br/>conversions</b> |
|---------------|---------------------------------------------------------------|----------------------------------------------------------------|----------------------------------------------------------------|-------------------------------------------|
| A8            | 88                                                            | 80                                                             | 51                                                             | 5                                         |
| A9            | 67                                                            | 64                                                             | 42                                                             | 4                                         |
| A17           | 86                                                            | 74                                                             | 44                                                             | 10                                        |
| A19           | 86                                                            | 78                                                             | 55                                                             | 10                                        |
| A20           | 73                                                            | 66                                                             | 52                                                             | 9                                         |
| A23           | 82                                                            | 73                                                             | 45                                                             | 10                                        |
| A38           | 97                                                            | 83                                                             | 55                                                             | 8                                         |
| A40           | 84                                                            | 75                                                             | 45                                                             | 7                                         |
| A41           | 79                                                            | 72                                                             | 49                                                             | 9                                         |
| A42           | 89                                                            | 69                                                             | 50                                                             | 10                                        |
| A48           | 90                                                            | 76                                                             | 51                                                             | 1                                         |
| A54           | 71                                                            | 68                                                             | 45                                                             | 8                                         |
| A58           | 78                                                            | 71                                                             | 44                                                             | 5                                         |
| A59           | 87                                                            | 76                                                             | 52                                                             | 6                                         |
| A61           | 74                                                            | 64                                                             | 47                                                             | 7                                         |
| C5            | 87                                                            | 77                                                             | 54                                                             | 7                                         |
| C6            | 103                                                           | 85                                                             | 53                                                             | 7                                         |
| C7            | 73                                                            | 65                                                             | 41                                                             | 4                                         |
| C8            | 91                                                            | 81                                                             | 56                                                             | 3                                         |
| C16           | 67                                                            | 59                                                             | 50                                                             | 6                                         |
| C17           | 85                                                            | 72                                                             | 45                                                             | 5                                         |
| C23           | 91                                                            | 84                                                             | 55                                                             | 4                                         |
| C24           | 91                                                            | 77                                                             | 59                                                             | 1                                         |
| C26           | 69                                                            | 54                                                             | 46                                                             | 4                                         |
| C27           | 80                                                            | 67                                                             | 50                                                             | 8                                         |
| C28           | 88                                                            | 81                                                             | 59                                                             | 8                                         |
| C32           | 85                                                            | 74                                                             | 61                                                             | 6                                         |
| C35           | 89                                                            | 81                                                             | 53                                                             | 5                                         |
| C36           | 89                                                            | 77                                                             | 55                                                             | 4                                         |
| C38           | 87                                                            | 77                                                             | 55                                                             | 0                                         |
| ED3           | 82                                                            | 75                                                             | 46                                                             | 4                                         |
| ED4           | 84                                                            | 76                                                             | 55                                                             | 4                                         |
| ED5           | 77                                                            | 75                                                             | 52                                                             | 8                                         |
| ED6           | 72                                                            | 70                                                             | 51                                                             | 9                                         |
| ED8           | 67                                                            | 59                                                             | 51                                                             | 2                                         |
| ED13          | 74                                                            | 64                                                             | 51                                                             | 6                                         |
| ED16          | 85                                                            | 77                                                             | 62                                                             | 3                                         |
| ED17          | 81                                                            | 72                                                             | 51                                                             | 6                                         |

---

|      |    |    |    |    |
|------|----|----|----|----|
| ED18 | 73 | 64 | 44 | 11 |
| ED21 | 81 | 77 | 51 | 7  |
| ED22 | 84 | 78 | 52 | 3  |
| ED28 | 60 | 56 | 41 | 3  |
| ED30 | 79 | 73 | 49 | 7  |
| EW2  | 90 | 78 | 50 | *  |
| EW8  | 69 | 61 | 42 | *  |
| EW9  | 87 | 75 | 58 | *  |
| EW16 | 81 | 70 | 54 | *  |
| EW24 | 75 | 67 | 48 | *  |
| EW29 | 90 | 81 | 49 | *  |

---

\* The genomes of workers did not used to detect gene conversion due to high errors calling gene conversions in the heterozygous genome.

**Table S5. Gene conversion events detected in multi-copy regions.** The three types of gene conversion here (Het → Hom, Hom → Het and Het-Hom → Het-Hom) corresponding to supplemental figure 6A, 6B and 6C, respectively.

| Type              | Number of events |
|-------------------|------------------|
| Het → Hom         | 14               |
| Hom → Het         | 16               |
| Het-Hom → Het-Hom | 15               |

**Table S6. List of crossover hot- and cold-spot regions.** Defined by Poisson distribution with  $P < 0.01$  and  $P < 0.05$ , respectively, window size is 200 Kb. These numbers do not include multiple crossovers between a given pair of markers.

| Hot regions<br>(Chromosome:Start-end, Mb) | Recombination<br>rate (cM/Mb) | <i>P</i> -value |
|-------------------------------------------|-------------------------------|-----------------|
| LG1:0.6-0.8                               | 69.76744186                   | $P < 0.05$      |
| LG1:1.4-1.6                               | 81.39534884                   | $P < 0.01$      |
| LG1:2.2-2.4                               | 81.39534884                   | $P < 0.01$      |
| LG1:3.4-3.6                               | 69.76744186                   | $P < 0.05$      |
| LG1:4-4.2                                 | 116.2790698                   | $P < 0.01$      |
| LG1:8.4-8.6                               | 69.76744186                   | $P < 0.05$      |
| LG1:9.6-9.8                               | 69.76744186                   | $P < 0.05$      |
| LG1:15.4-15.6                             | 69.76744186                   | $P < 0.05$      |
| LG1:16.8-17                               | 81.39534884                   | $P < 0.01$      |
| LG1:19.4-19.6                             | 69.76744186                   | $P < 0.05$      |
| LG1:23.4-23.6                             | 69.76744186                   | $P < 0.05$      |
| LG1:28.8-29                               | 69.76744186                   | $P < 0.05$      |
| LG10:5.8-6                                | 69.76744186                   | $P < 0.05$      |
| LG10:6.2-6.8                              | 104.6511628                   | $P < 0.01$      |
| LG10:7.4-7.6                              | 81.39534884                   | $P < 0.01$      |
| LG10:10.2-10.4                            | 104.6511628                   | $P < 0.01$      |
| LG10:10.6-11                              | 69.76744186                   | $P < 0.05$      |
| LG10:11.4-11.6                            | 69.76744186                   | $P < 0.05$      |
| LG11:1.8-2.2                              | 87.20930233                   | $P < 0.01$      |
| LG11:7.8-8                                | 81.39534884                   | $P < 0.01$      |
| LG11:8.4-8.6                              | 81.39534884                   | $P < 0.01$      |
| LG11:9.6-9.8                              | 69.76744186                   | $P < 0.05$      |
| LG11:10.2-10.4                            | 81.39534884                   | $P < 0.01$      |
| LG11:11.4-11.6                            | 69.76744186                   | $P < 0.05$      |
| LG12:9.6-9.8                              | 69.76744186                   | $P < 0.05$      |
| LG12:10.2-10.4                            | 69.76744186                   | $P < 0.05$      |

|               |             |                |
|---------------|-------------|----------------|
| LG12:11-11.2  | 69.76744186 | <i>P</i> <0.05 |
| LG13:1.6-1.8  | 69.76744186 | <i>P</i> <0.05 |
| LG13:5.4-5.6  | 139.5348837 | <i>P</i> <0.01 |
| LG14:6.6-6.8  | 69.76744186 | <i>P</i> <0.05 |
| LG15:5.6-5.8  | 104.6511628 | <i>P</i> <0.01 |
| LG15:7.2-7.4  | 93.02325581 | <i>P</i> <0.01 |
| LG15:9.2-9.4  | 69.76744186 | <i>P</i> <0.05 |
| LG16:3-3.2    | 104.6511628 | <i>P</i> <0.01 |
| LG2:6.2-6.4   | 197.6744186 | <i>P</i> <0.01 |
| LG2:8.4-8.6   | 69.76744186 | <i>P</i> <0.05 |
| LG2:14-14.2   | 93.02325581 | <i>P</i> <0.01 |
| LG3:4.4-4.6   | 69.76744186 | <i>P</i> <0.05 |
| LG3:5.2-5.4   | 69.76744186 | <i>P</i> <0.05 |
| LG3:9.6-9.8   | 69.76744186 | <i>P</i> <0.05 |
| LG4:2.2-2.4   | 81.39534884 | <i>P</i> <0.01 |
| LG4:7.2-7.4   | 69.76744186 | <i>P</i> <0.05 |
| LG4:8.8-9     | 69.76744186 | <i>P</i> <0.05 |
| LG4:10.2-10.4 | 93.02325581 | <i>P</i> <0.01 |
| LG4:12-12.2   | 69.76744186 | <i>P</i> <0.05 |
| LG5:12.4-12.6 | 93.02325581 | <i>P</i> <0.01 |
| LG6:5.6-5.8   | 197.6744186 | <i>P</i> <0.01 |
| LG6:13.8-14   | 69.76744186 | <i>P</i> <0.05 |
| LG6:18-18.4   | 93.02325581 | <i>P</i> <0.01 |
| LG7:2.6-2.8   | 69.76744186 | <i>P</i> <0.05 |
| LG7:3.2-3.4   | 69.76744186 | <i>P</i> <0.05 |
| LG7:3.6-3.8   | 81.39534884 | <i>P</i> <0.01 |
| LG7:10.6-10.8 | 69.76744186 | <i>P</i> <0.05 |
| LG8:3-3.2     | 69.76744186 | <i>P</i> <0.05 |
| LG8:5.6-5.8   | 69.76744186 | <i>P</i> <0.05 |
| LG8:6-6.2     | 81.39534884 | <i>P</i> <0.01 |
| LG8:7.6-7.8   | 81.39534884 | <i>P</i> <0.01 |
| LG9:7.4-7.6   | 69.76744186 | <i>P</i> <0.05 |

---

| Cold regions<br>(Chromosome:Start-end, Mb) | Recombination<br>rate (cM/Mb) | <i>P</i> -value |
|--------------------------------------------|-------------------------------|-----------------|
| LG1:5.8-6.4                                | 0                             | <i>P</i> <0.01  |
| LG1:6.6-7                                  | 0                             | <i>P</i> <0.01  |
| LG1:11.8-12.8                              | 0                             | <i>P</i> <0.01  |
| LG1:14.6-15.2                              | 0                             | <i>P</i> <0.01  |
| LG1:19.8-20.2                              | 0                             | <i>P</i> <0.05  |
| LG1:21.0-21.4                              | 0                             | <i>P</i> <0.05  |
| LG2:0.2-0.6                                | 0                             | <i>P</i> <0.05  |
| LG2:0.8-2.0                                | 0                             | <i>P</i> <0.01  |
| LG2:3.2-3.6                                | 0                             | <i>P</i> <0.05  |
| LG4:0.4-1.0                                | 0                             | <i>P</i> <0.01  |

|               |   |                |
|---------------|---|----------------|
| LG4:1.2-1.6   | 0 | <i>P</i> <0.05 |
| LG4:4.6-5.0   | 0 | <i>P</i> <0.05 |
| LG4:11.0-11.4 | 0 | <i>P</i> <0.05 |
| LG5:0-0.4     | 0 | <i>P</i> <0.05 |
| LG5:3.2-3.6   | 0 | <i>P</i> <0.05 |
| LG5:13.4-13.8 | 0 | <i>P</i> <0.05 |
| LG6:0.8-1.2   | 0 | <i>P</i> <0.05 |
| LG6:2.2-2.8   | 0 | <i>P</i> <0.01 |
| LG6:4.4-4.8   | 0 | <i>P</i> <0.05 |
| LG6:6-6.4     | 0 | <i>P</i> <0.05 |
| LG6:10.6-11   | 0 | <i>P</i> <0.05 |
| LG6:13.2-13.6 | 0 | <i>P</i> <0.05 |
| LG6:16.6-17   | 0 | <i>P</i> <0.05 |
| LG6:17.2-17.6 | 0 | <i>P</i> <0.05 |
| LG7:4.6-5.2   | 0 | <i>P</i> <0.01 |
| LG7:6.2-7.8   | 0 | <i>P</i> <0.01 |
| LG7:8-8.4     | 0 | <i>P</i> <0.05 |
| LG8:0.2-0.6   | 0 | <i>P</i> <0.05 |
| LG8:1.6-2.6   | 0 | <i>P</i> <0.01 |
| LG8:6.2-6.8   | 0 | <i>P</i> <0.01 |
| LG8:8.8-9.2   | 0 | <i>P</i> <0.05 |
| LG8:12.2-13   | 0 | <i>P</i> <0.01 |
| LG9:0-0.8     | 0 | <i>P</i> <0.01 |
| LG9:3.2-3.6   | 0 | <i>P</i> <0.05 |
| LG9:4.8-5.4   | 0 | <i>P</i> <0.01 |
| LG9:5.6-6.2   | 0 | <i>P</i> <0.01 |
| LG10:0.2-0.6  | 0 | <i>P</i> <0.05 |
| LG10:0.8-1.2  | 0 | <i>P</i> <0.05 |
| LG10:5.2-5.6  | 0 | <i>P</i> <0.05 |
| LG10:6.8-7.4  | 0 | <i>P</i> <0.01 |
| LG11:4-5.2    | 0 | <i>P</i> <0.01 |
| LG11:6.6-7.2  | 0 | <i>P</i> <0.01 |
| LG11:13-13.6  | 0 | <i>P</i> <0.01 |
| LG12:1.6-2.4  | 0 | <i>P</i> <0.01 |
| LG12:2.8-3.4  | 0 | <i>P</i> <0.01 |
| LG12:3.6-4    | 0 | <i>P</i> <0.05 |
| LG13:5.6-6    | 0 | <i>P</i> <0.05 |
| LG13:6.8-7.8  | 0 | <i>P</i> <0.01 |
| LG14:0-0.6    | 0 | <i>P</i> <0.01 |
| LG14:1.2-1.6  | 0 | <i>P</i> <0.05 |
| LG15:0.6-2    | 0 | <i>P</i> <0.01 |
| LG15:2.2-2.6  | 0 | <i>P</i> <0.05 |
| LG16:0-0.4    | 0 | <i>P</i> <0.05 |
| LG16:1.4-2    | 0 | <i>P</i> <0.01 |

---





**Table S7. Statistics of CO hotspots in each colony.** These numbers do not include multiple crossovers between a given pair of markers.

|                                 | <b>Colony A</b> |                | <b>Colony C</b> |                | <b>Colony E</b> |                |
|---------------------------------|-----------------|----------------|-----------------|----------------|-----------------|----------------|
|                                 | <i>P</i> <0.05  | <i>P</i> <0.01 | <i>P</i> <0.05  | <i>P</i> <0.01 | <i>P</i> <0.05  | <i>P</i> <0.01 |
| No. of CO hotspots (Length, Mb) | 52 (10.8)       | 15 (3.0)       | 61 (13.0)       | 19 (4.2)       | 40 (8.0)        | 12 (2.4)       |
| Shared by 3 colonies (Mb)       | 3 (0.6)         | 1 (0.2)        | 3 (0.6)         | 1 (0.2)        | 3 (0.6)         | 1 (0.2)        |
| Shared by 2 colonies only (Mb)  | 9 (1.8)         | 2 (0.4)        | 9 (1.8)         | 3 (0.6)        | 8 (1.6)         | 3 (0.6)        |
| Colony specified (Mb)           | 40 (8.4)        | 12 (2.4)       | 49 (10.6)       | 15 (3.4)       | 29 (5.8)        | 8 (1.6)        |
| No. of COs within hotspots (%)  | 186 (25%)       | 69 (9%)        | 224 (29%)       | 92 (12%)       | 139 (22%)       | 52 (8%)        |

CO hotspots are defined by Poisson distribution with *P*<0.05 and *P*<0.01 based on whole genome CO distribution (Window size: 200 Kb).

**Table S8. Relationship between recombination regions or/and multi-copy regions and genes with biased expression in brain or fat body.** The statistics were performed by Chi-square test with a 2 by 2 table comparing between whole-genomic genes and the biased genes. All these results have shown that genes with worker-brain biased expression are strongly associated with the recombination ( $P < 0.029$  to  $2.2 \times 10^{-16}$ ), whereas the drone-biased expression genes are significantly deviated from the regions with recombination in the honeybees ( $P < 1.7 \times 10^{-10}$  to  $2.2 \times 10^{-16}$ ); in fat body, genes with drone-biased expression are strongly associated with the recombination ( $P < 0.0002$ ).

| Sets of genes                                                                                                                         |                                                                       | Genes within or around the breakpoints | Genes away from the breakpoints | Chi-square test with a 2 by 2 table, df.=1 |                |
|---------------------------------------------------------------------------------------------------------------------------------------|-----------------------------------------------------------------------|----------------------------------------|---------------------------------|--------------------------------------------|----------------|
|                                                                                                                                       |                                                                       |                                        |                                 | $\chi^2$                                   | $P$            |
| <b>Whole-genome genes</b>                                                                                                             |                                                                       | <b>1745</b>                            | <b>10373</b>                    | <b>*</b>                                   | <b>*</b>       |
| A. Brain expression genes within break-point regions or around the break-point regions within 10 kb                                   | Worker-biased genes in reference (1)                                  | 70                                     | 312                             | 4.77                                       | <b>0.029</b>   |
|                                                                                                                                       | Worker-biased genes in reference (2)                                  | 128                                    | 317                             | 74.49                                      | <b>2.2e-16</b> |
|                                                                                                                                       | Worker-biased expression genes overlapping references (1)and (2)      | 22                                     | 44                              | 19.19                                      | <b>1.2e-5</b>  |
|                                                                                                                                       | Union set of worker-biased expression genes in references (1) and (2) | 173                                    | 579                             | 45.18                                      | <b>1.8e-11</b> |
|                                                                                                                                       | Queen-biased genes in reference (1)                                   | 67                                     | 456                             | 1.07                                       | 0.30           |
|                                                                                                                                       | Drone-biased genes in reference (2)                                   | 77                                     | 958                             | 40.68                                      | <b>1.7e-10</b> |
|                                                                                                                                       | Positive selected genes in reference (3)                              | 159                                    | 704                             | 11.34                                      | <b>7.6e-4</b>  |
| <b>Whole-genome genes</b>                                                                                                             |                                                                       | <b>2644</b>                            | <b>9474</b>                     | <b>*</b>                                   | <b>*</b>       |
| B. Brain expression genes in multi-copy regions in our three colonies                                                                 | Worker-biased genes in reference (1)                                  | 112                                    | 270                             | 12.60                                      | <b>3.9e-4</b>  |
|                                                                                                                                       | Worker-biased genes in reference (2)                                  | 186                                    | 259                             | 104.13                                     | <b>2.2e-16</b> |
|                                                                                                                                       | Worker-biased expression genes overlapping references (1)and (2)      | 35                                     | 31                              | 37.69                                      | <b>8.3e-10</b> |
|                                                                                                                                       | Union set of worker-biased expression genes in references (1) and (2) | 263                                    | 489                             | 76.29                                      | <b>2.2e-16</b> |
|                                                                                                                                       | Queen-biased genes in reference (1)                                   | 117                                    | 406                             | 0.09                                       | 0.76           |
|                                                                                                                                       | Drone-biased genes in reference (2)                                   | 108                                    | 927                             | 78.63                                      | <b>2.2e-16</b> |
| Positive selected genes in reference (3)                                                                                              | 282                                                                   | 581                                    | 59.64                           | <b>1.1e-14</b>                             |                |
| <b>Whole-genome genes</b>                                                                                                             |                                                                       | <b>3400</b>                            | <b>8718</b>                     | <b>*</b>                                   | <b>*</b>       |
| C. Overlapped Brain expression genes within break-point regions or around the break-point regions within 10 kb and multi-copy regions | Worker-biased genes in reference (1)                                  | 133                                    | 249                             | 8.65                                       | <b>3.3e-3</b>  |
|                                                                                                                                       | Worker-biased genes in reference (2)                                  | 220                                    | 225                             | 100.78                                     | <b>2.2e-16</b> |
|                                                                                                                                       | Worker-biased expression genes overlapping references (1)and (2)      | 39                                     | 27                              | 31.49                                      | <b>2.0e-8</b>  |
|                                                                                                                                       | Union set of worker-biased expression genes in references (1) and (2) | 314                                    | 438                             | 69.90                                      | <b>2.2e-16</b> |
|                                                                                                                                       | Queen-biased genes in reference (1)                                   | 141                                    | 382                             | 0.31                                       | 0.58           |
|                                                                                                                                       | Drone-biased genes in reference (2)                                   | 158                                    | 877                             | 83.90                                      | <b>2.2e-16</b> |
|                                                                                                                                       | Positive selected genes in reference (3)                              | 340                                    | 523                             | 54.98                                      | <b>1.2e-13</b> |
| <b>Whole-genome genes</b>                                                                                                             |                                                                       | <b>1745</b>                            | <b>10373</b>                    | <b>*</b>                                   | <b>*</b>       |
| D. Fat body expression genes within break-point regions or around the break-point                                                     | Worker-biased genes in reference (4)                                  | 5                                      | 39                              | 0.33                                       | 0.57           |
|                                                                                                                                       | Queen-biased genes in reference (4)                                   | 15                                     | 105                             | 0.35                                       | 0.55           |
|                                                                                                                                       | Drone-biased genes in reference (4)                                   | 15                                     | 29                              | 13.84                                      | <b>0.0002</b>  |

Reference:

1. Grozinger CM, Fan Y, Hoover SER, Winston ML: **Genome-wide analysis reveals differences in brain gene expression patterns associated with caste and reproductive status in honey bees (*Apis mellifera*)**. *Mol Ecol* 2007, **16**: 4837–4848.
2. Zayed A, Naeger NL, Rodriguez-Zas SL, Robinson GE: **Common and novel transcriptional routes to behavioral maturation in worker and male honey bees**. *Genes Brain Behav* 2012, **11**: 253–261.
3. Harpur BA, Kent CF, Molodtsova D, Lebon J, Alqarni A, Owayss A, Zayed A: **Population genomics of the honey bee reveals strong signatures of positive selection on worker traits**. *Proc Natl Acad Sci* 2014, doi:10.1073/pnas.1315506111.
4. Chan QWT, Chan MY, Logan M, Fang Y, Higo H, Foster LJ: **Honey bee protein atlas at organ-level resolution**. *Genome Res* 2013, **23**: 1951–1960.

**Table S9. List of 17 genes related to nervous system or behavior.**

| <b>Gene Symbol</b> | <b>Function</b>                                                                                                                                                         |
|--------------------|-------------------------------------------------------------------------------------------------------------------------------------------------------------------------|
| <i>AmE75</i>       | Involved in regulation of brain function [1, 2].                                                                                                                        |
| <i>Cpx</i>         | Involved in neuronal communication and synaptic growth in fruit fly [3–5].                                                                                              |
| <i>Ct</i>          | Regulate distinct patterns of dendrite branching [6].                                                                                                                   |
| <i>Dh31-R1</i>     | Member of GPCR family 2, has hormone receptor activity.                                                                                                                 |
| <i>Dl</i>          | Encodes neurogenic locus protein.                                                                                                                                       |
| <i>Mirr</i>        | Mediate convergent sensory neuron specification, local differentiation and topographic wiring in fruit fly [7].                                                         |
| <i>NLGN3</i>       | Encodes neuronal cell surface protein.                                                                                                                                  |
| <i>NT8</i>         | Neurotransmitter transporter 8.                                                                                                                                         |
| <i>Par-1</i>       | Initiates neurodegeneration in fruit fly [8].                                                                                                                           |
| <i>Pka-C3</i>      | Involved in progressive neurodegeneration [9].                                                                                                                          |
| <i>Rgl</i>         | Regulates neuroblast cortical polarity and spindle orientation, and also study has showed that this gene may associated with aggressive behavior in fruit fly [10, 11]. |
| <i>Sema-2a</i>     | Affect axon steering, fasciculation, branching and synapse formation [12].                                                                                              |
| <i>SK</i>          | Involved in courtship memory and mediate multiple forms of behavioral plasticity [13].                                                                                  |
| <i>Ss</i>          | Necessary for the diversification of dendrite morphology of dendritic arborization neurons [14].                                                                        |
| <i>Toll-6</i>      | Functions as neurotrophin receptors in fruit fly [15].                                                                                                                  |
| <i>Toll-10</i>     | In the same gene family with Toll-6.                                                                                                                                    |
| <i>Ubx</i>         | Plays a critical role in conferring segment-appropriate morphology and survival on individual neurons in the adult-specific ventral CNS [16].                           |

## References:

1. Paul RK, Takeuchi H, Matsuo Y, Kubo T: **Gene expression of ecdysteroid - regulated gene E74 of the honeybee in ovary and brain.** *Insect Mol Biol* 2005, **14**:9–15.
2. Paul RK, Takeuchi H, Kubo T: **Expression of Two Ecdysteroid-Regulated Genes, Broad-Complex and E75 , in the Brain and Ovary of the Honeybee (Apis mellifera L.).** *Zoolog Sci* 2006, **23**:1085–1092.
3. Huntwork S, Littleton JT: **A complexin fusion clamp regulates spontaneous neurotransmitter release and synaptic growth.** *Nat Neurosci* 2007, **10**:1235–1237.
4. Xue M, Lin YQ, Pan H, Reim K, Deng H, Bellen HJ, Rosenmund C: **Tilting the balance between facilitatory and inhibitory functions of mammalian and Drosophila Complexins orchestrates synaptic vesicle exocytosis.** *Neuron* 2009,

64:367–380.

5. Jorquera RA, Huntwork-Rodriguez S, Akbergenova Y, Cho RW, Littleton JT: **Complexin controls spontaneous and evoked neurotransmitter release by regulating the timing and properties of synaptotagmin activity.** *J Neurosci Off J Soc Neurosci* 2012, **32**:18234–18245.

6. Grueber WB, Jan LY, Jan YN: **Different Levels of the Homeodomain Protein Cut Regulate Distinct Dendrite Branching Patterns of Drosophila Multidendritic Neurons.** *Cell* 2003, **112**:805–818.

7. Karim MR, Moore AW: **Convergent local identity and topographic projection of sensory neurons.** *J Neurosci Off J Soc Neurosci* 2011, **31**:17017–17027.

8. Nishimura I, Yang Y, Lu B: **PAR-1 Kinase Plays an Initiator Role in a Temporally Ordered Phosphorylation Process that Confers Tau Toxicity in Drosophila.** *Cell* 2004, **116**:671–682.

9. Bettencourt da Cruz A, Wentzell J, Kretschmar D: **Swiss Cheese, a protein involved in progressive neurodegeneration, acts as a noncanonical regulatory subunit for PKA-C3.** *J Neurosci Off J Soc Neurosci* 2008, **28**:10885–10892.

10. Carmena A, Makarova A, Speicher S: **The Rap1-Rgl-Ral signaling network regulates neuroblast cortical polarity and spindle orientation.** *J Cell Biol* 2011, **195**:553–562.

11. Edwards AC, Mackay TFC: **Quantitative Trait Loci for Aggressive Behavior in Drosophila melanogaster.** *Genetics* 2009, **182**:889–897.

12. Goodman CS, Kolodkin AL, Luo Y, Püschel AW, Raper JA: **Unified Nomenclature for the Semaphorins/Collapsins.** *Cell* 1999, **97**:551–552.

13. Abou Tayoun AN, Pikielny C, Dolph PJ: **Roles of the Drosophila SK channel (dSK) in courtship memory.** *PLoS One* 2012, **7**:e34665.

14. Kim MD, Jan LY, Jan YN: **The bHLH-PAS protein Spineless is necessary for the diversification of dendrite morphology of Drosophila dendritic arborization neurons.** *Genes Dev* 2006, **20**:2806–2819.

15. McIlroy G, Foldi I, Aurikko J, Wentzell JS, Lim MA, Fenton JC, Gay NJ, Hidalgo A: **Toll-6 and Toll-7 function as neurotrophin receptors in the Drosophila melanogaster CNS.** *Nat Neurosci* 2013, **16**:1248–1256.

16. Marin EC, Dry KE, Alaimo DR, Rudd KT, Cillo AR, Clenshaw ME, Negre N, White KP, Truman JW: **Ultrabithorax confers spatial identity in a context-specific manner in the Drosophila postembryonic ventral nervous system.** *Neural Develop* 2012, **7**:31.



**Table S10. DAVID annotation clusters enriched in genes overlap with crossover.**  
 4 clusters of genes showed functional enrichment in this gene set. Notably, the first cluster of genes (GPCRs), which is responsible for sensing signals and responding to environment, is enriched in genes that overlap with crossovers.

| <b>Annotation Cluster 1</b> |                                                                 | Enrichment Score:<br>1.255062533368358 |           |               |
|-----------------------------|-----------------------------------------------------------------|----------------------------------------|-----------|---------------|
| <b>Category</b>             | <b>Term</b>                                                     | <b>Count</b>                           | <b>%</b>  | <b>PValue</b> |
| KEGG_PATHWAY                | ame04080:Neuroactive ligand-receptor interaction                | 5                                      | 0.3004808 | 0.0012232     |
| GOTERM_CC_FAT               | GO:0031224~intrinsic to membrane                                | 14                                     | 0.8413462 | 0.0014646     |
| GOTERM_CC_FAT               | GO:0016021~integral to membrane                                 | 13                                     | 0.78125   | 0.0127157     |
| SP_PIR_KEYWORDS             | receptor                                                        | 11                                     | 0.6610577 | 0.0325653     |
| SP_PIR_KEYWORDS             | transmembrane                                                   | 14                                     | 0.8413462 | 0.1407212     |
| INTERPRO                    | IPR000276:7TM GPCR, rhodopsin-like                              | 5                                      | 0.3004808 | 0.1915298     |
| INTERPRO                    | IPR017452:GPCR, rhodopsin-like superfamily                      | 5                                      | 0.3004808 | 0.1915298     |
| SP_PIR_KEYWORDS             | g-protein coupled receptor                                      | 6                                      | 0.3605769 | 0.1932541     |
| SP_PIR_KEYWORDS             | transducer                                                      | 6                                      | 0.3605769 | 0.1932541     |
| GOTERM_BP_FAT               | GO:0007166~cell surface receptor linked signal transduction     | 6                                      | 0.3605769 | 0.3307096     |
| GOTERM_BP_FAT               | GO:0007186~G-protein coupled receptor protein signaling pathway | 6                                      | 0.3605769 | 0.3307096     |

  

| <b>Annotation Cluster 2</b> |                                                   | Enrichment Score:<br>1.0521597001950618 |           |               |
|-----------------------------|---------------------------------------------------|-----------------------------------------|-----------|---------------|
| <b>Category</b>             | <b>Term</b>                                       | <b>Count</b>                            | <b>%</b>  | <b>PValue</b> |
| COG_ONTOLOGY                | Lipid metabolism                                  | 4                                       | 0.2403846 | 0.0225421     |
| INTERPRO                    | IPR002018:Carboxylesterase, type B                | 3                                       | 0.1802885 | 0.175899      |
| INTERPRO                    | IPR019819:Carboxylesterase type B, conserved site | 3                                       | 0.1802885 | 0.175899      |

  

| <b>Annotation Cluster 3</b> |                                          | Enrichment Score:<br>0.8548117966482504 |           |               |
|-----------------------------|------------------------------------------|-----------------------------------------|-----------|---------------|
| <b>Category</b>             | <b>Term</b>                              | <b>Count</b>                            | <b>%</b>  | <b>PValue</b> |
| GOTERM_MF_FAT               | GO:0043565~sequence-specific DNA binding | 6                                       | 0.3605769 | 0.0080733     |
| GOTERM_MF_FAT               | GO:0003677~DNA binding                   | 7                                       | 0.4206731 | 0.0117495     |
| GOTERM_MF_FAT               | GO:0003700~transcription factor activity | 5                                       | 0.3004808 | 0.0562203     |
| GOTERM_BP_FAT               | GO:0006355~regulation of                 | 6                                       | 0.3605769 | 0.0806785     |



|                 |                                                                                  |   |           |           |
|-----------------|----------------------------------------------------------------------------------|---|-----------|-----------|
| GOTERM_BP_FAT   | transcription DNA-dependent<br>GO:0051252~regulation of RNA<br>metabolic process | 6 | 0.3605769 | 0.0806785 |
| GOTERM_MF_FAT   | GO:0030528~transcription regulator<br>activity                                   | 5 | 0.3004808 | 0.0851108 |
| GOTERM_BP_FAT   | GO:0006350~transcription                                                         | 3 | 0.1802885 | 0.1041926 |
| SP_PIR_KEYWORDS | dna-binding                                                                      | 6 | 0.3605769 | 0.1140531 |
| GOTERM_MF_FAT   | GO:0008270~zinc ion binding                                                      | 4 | 0.2403846 | 0.1176367 |
| GOTERM_BP_FAT   | GO:0045449~regulation of<br>transcription                                        | 6 | 0.3605769 | 0.1227442 |
| SP_PIR_KEYWORDS | Transcription                                                                    | 3 | 0.1802885 | 0.1663828 |
| SP_PIR_KEYWORDS | transcription regulation                                                         | 4 | 0.2403846 | 0.1800322 |
| SP_PIR_KEYWORDS | nucleus                                                                          | 5 | 0.3004808 | 0.3211783 |
| SP_PIR_KEYWORDS | zinc                                                                             | 3 | 0.1802885 | 0.349871  |
| GOTERM_MF_FAT   | GO:0046872~metal ion binding                                                     | 5 | 0.3004808 | 0.3632676 |
| GOTERM_MF_FAT   | GO:0043169~cation binding                                                        | 5 | 0.3004808 | 0.4722642 |
| GOTERM_MF_FAT   | GO:0043167~ion binding                                                           | 5 | 0.3004808 | 0.4722642 |
| GOTERM_MF_FAT   | GO:0046914~transition metal ion<br>binding                                       | 4 | 0.2403846 | 0.5387913 |
| SP_PIR_KEYWORDS | metal-binding                                                                    | 3 | 0.1802885 | 0.7700051 |

---

| <b>Annotation Cluster 4</b> |                                                               | Enrichment Score:<br>0.7484154350876936 |           |               |
|-----------------------------|---------------------------------------------------------------|-----------------------------------------|-----------|---------------|
| <b>Category</b>             | <b>Term</b>                                                   | <b>Count</b>                            | <b>%</b>  | <b>PValue</b> |
| GOTERM_CC_FAT               | GO:0031224~intrinsic to membrane                              | 14                                      | 0.8413462 | 0.0014646     |
| GOTERM_CC_FAT               | GO:0016021~integral to membrane                               | 13                                      | 0.78125   | 0.0127157     |
| PIR_SUPERFAMILY             | PIRSF002443:acetylcholine receptor                            | 4                                       | 0.2403846 | 0.035776      |
| GOTERM_MF_FAT               | GO:0005216~ion channel activity                               | 5                                       | 0.3004808 | 0.0851108     |
| GOTERM_MF_FAT               | GO:0015267~channel activity                                   | 5                                       | 0.3004808 | 0.0851108     |
| GOTERM_MF_FAT               | GO:0022803~passive transmembrane<br>transporter activity      | 5                                       | 0.3004808 | 0.0851108     |
| GOTERM_MF_FAT               | GO:0022838~substrate specific<br>channel activity             | 5                                       | 0.3004808 | 0.0851108     |
| SP_PIR_KEYWORDS             | ionic channel                                                 | 6                                       | 0.3605769 | 0.0921943     |
| GOTERM_MF_FAT               | GO:0042165~neurotransmitter<br>binding                        | 5                                       | 0.3004808 | 0.1019566     |
| GOTERM_MF_FAT               | GO:0030594~neurotransmitter<br>receptor activity              | 5                                       | 0.3004808 | 0.1019566     |
| SP_PIR_KEYWORDS             | transmembrane                                                 | 14                                      | 0.8413462 | 0.1407212     |
| SP_PIR_KEYWORDS             | ion transport                                                 | 6                                       | 0.3605769 | 0.164769      |
| SP_PIR_KEYWORDS             | cell membrane                                                 | 5                                       | 0.3004808 | 0.2092028     |
| GOTERM_MF_FAT               | GO:0005230~extracellular<br>ligand-gated ion channel activity | 4                                       | 0.2403846 | 0.2275406     |

|                 |                                                                   |   |           |           |
|-----------------|-------------------------------------------------------------------|---|-----------|-----------|
| GOTERM_MF_FAT   | GO:0015276~ligand-gated ion channel activity                      | 4 | 0.2403846 | 0.2275406 |
| GOTERM_MF_FAT   | GO:0022836~gated channel activity                                 | 4 | 0.2403846 | 0.2275406 |
| GOTERM_MF_FAT   | GO:0022834~ligand-gated channel activity                          | 4 | 0.2403846 | 0.2275406 |
| INTERPRO        | IPR006029:Neurotransmitter-gated ion-channel transmembrane region | 4 | 0.2403846 | 0.2301239 |
| INTERPRO        | IPR006201:Neurotransmitter-gated ion-channel                      | 4 | 0.2403846 | 0.3066394 |
| INTERPRO        | IPR006202:Neurotransmitter-gated ion-channel ligand-binding       | 4 | 0.2403846 | 0.3066394 |
| GOTERM_CC_FAT   | GO:0045211~postsynaptic membrane                                  | 4 | 0.2403846 | 0.3133799 |
| GOTERM_CC_FAT   | GO:0044456~synapse part                                           | 4 | 0.2403846 | 0.3521745 |
| GOTERM_CC_FAT   | GO:0045202~synapse                                                | 4 | 0.2403846 | 0.3521745 |
| SP_PIR_KEYWORDS | cell junction                                                     | 4 | 0.2403846 | 0.3600918 |
| SP_PIR_KEYWORDS | synapse                                                           | 4 | 0.2403846 | 0.3600918 |
| SP_PIR_KEYWORDS | postsynaptic cell membrane                                        | 4 | 0.2403846 | 0.3600918 |
| GOTERM_CC_FAT   | GO:0005886~plasma membrane                                        | 4 | 0.2403846 | 0.3911454 |
| GOTERM_BP_FAT   | GO:0006811~ion transport                                          | 5 | 0.3004808 | 0.4154792 |
| INTERPRO        | IPR018000:Neurotransmitter-gated ion-channel, conserved site      | 3 | 0.1802885 | 0.479224  |
| SP_PIR_KEYWORDS | transport                                                         | 7 | 0.4206731 | 0.5119118 |
| GOTERM_CC_FAT   | GO:0030054~cell junction                                          | 3 | 0.1802885 | 0.5463093 |
| GOTERM_CC_FAT   | GO:0044459~plasma membrane part                                   | 3 | 0.1802885 | 0.6272634 |
| SP_PIR_KEYWORDS | membrane                                                          | 6 | 0.3605769 | 0.8581477 |
